# Supplementary material
Source: Research Square preprint supplement (doi:10.21203/rs.3.rs-9055004/v1)
Supplement: Supplementary file 1 [file a9ef31e97a747e9f41c2a588.docx]

Supplementary data legends

Supplemental Figure 1. Inhibitory effect of canagliflozin on the proliferation of cultured GBM cell lines

1. Dose responses of canagliflozin on proliferation in human GBM cell lines T98G, U87MG, and NGT191. Cell viability was assessed using the WST-1 assay. GBM cell lines were treated with indicated concentrations (0 - 200 μM) of canagliflozin for 72 hours. The viability of untreated cells (vehicle control: 0 μM canagliflozin) was considered 100 %. Data are presented as mean ± SEM. Similar results were obtained from triplicate experiments (**p* < 0.05, ***p* < 0.01, ****p* < 0.001, *****p* < 0.0001 vs. control culture: one-way ANOVA with Dunnett’s multiple comparisons). (B) Microscopic image of NGT41 cells 72 hours after canagliflozin treatment at the indicated doses.

Supplemental Figure 2. Effects of canagliflozin on AMPK activation in GBM cell lines.

Dose response of canagliflozin on the activation of AMPK and ACC in human GBM cell lines T98G, U87MG, and NGT191. Cells were treated with the indicated concentrations (0–100 μM) of canagliflozin for 72 hours. Cell lysates were subjected to immunoblot analysis using antibodies against phosphorylated AMPK (Thr172), total AMPK, phosphorylated ACC (Ser79), and total ACC. The level of phosphorylated and total AMPK or ACC was indicated by the corresponding bands. Immunoblots were subjected to densitometric quantification after standardizing phospho/total AMPK ratio and presented as a bar graph. Similar results were obtained from triplicate experiments (**p* < 0.05, ***p* < 0.01, ****p* < 0.001, *****p* < 0.0001 vs. control culture: one-way ANOVA with Dunnett’s multiple comparisons).

Supplemental Figure 3. Canagliflozin inhibits mTORC1 signaling in GBM cell lines

The human GBM cell lines T98G, U87MG, and NGT191 were treated with indicated concentrations of canagliflozin (0–100 μM) for 72 hours. Phosphorylation levels of p70S6K (Thr389) and S6 (Ser240/244) were analyzed by Western blot (A-C). The level of phosphorylated and total p70S6K or S6 was indicated by the corresponding bands. Densitometric analysis of phospho-p70S6K and phospho-S6 normalized to total protein levels. β-actin was used as a loading control. Immunoblots were subjected to densitometric quantification after standardizing phospho/total AMPK ratio and presented as a bar graph. Similar results were obtained from triplicate experiments (**p* < 0.05, ***p* <0.01, ****p* <0.001, *****p* <0.0001 vs. control culture: one-way ANOVA with Dunnett’s multiple comparisons).

Supplemental Figure 4. Effect of canagliflozin on translation: Evaluation of protein synthesis rate using SUnSET method

(A) Immunoblotting using anti-puromycin antibody against synthesized polypeptide chains. GBM cell lines NGT41, T98G, U87MG, and NGT191 were treated with canagliflozin (50 μM) for the indicated times, followed by puromycin administration and sampling. (B) Quantification of protein synthesis activity by canagliflozin. Immunoblotting results were quantified and presented as bar graphs. Similar results were obtained from triplicate experiments (**p* < 0.05, ***p* < 0.01, ****p* < 0.001, *****p* < 0.0001 vs. control culture: one-way ANOVA with Dunnett’s multiple comparisons).
